# Supplementary material for: Aqueous one-pot synthesis of well-defined zwitterionic diblock copolymers by RAFT polymerization: an efficient and environmentally-friendly route to a useful dispersant for aqueous pigments
Source: Royal Society of Chemistry journal article supplement (doi:10.1039/d0gc04271d), 2021-01-01
Supplement: d0gc04271d1.pdf [file d0gc04271d1.pdf]

Supporting Information for:

***Aqueous One-Pot Synthesis of Well-defined Zwitterionic Diblock Copolymers by RAFT  
Polymerization: An Efficient and Environmentally-friendly Route to a Useful Dispersant for  
Aqueous Pigments***

S. M. North and S. P. Armes\*

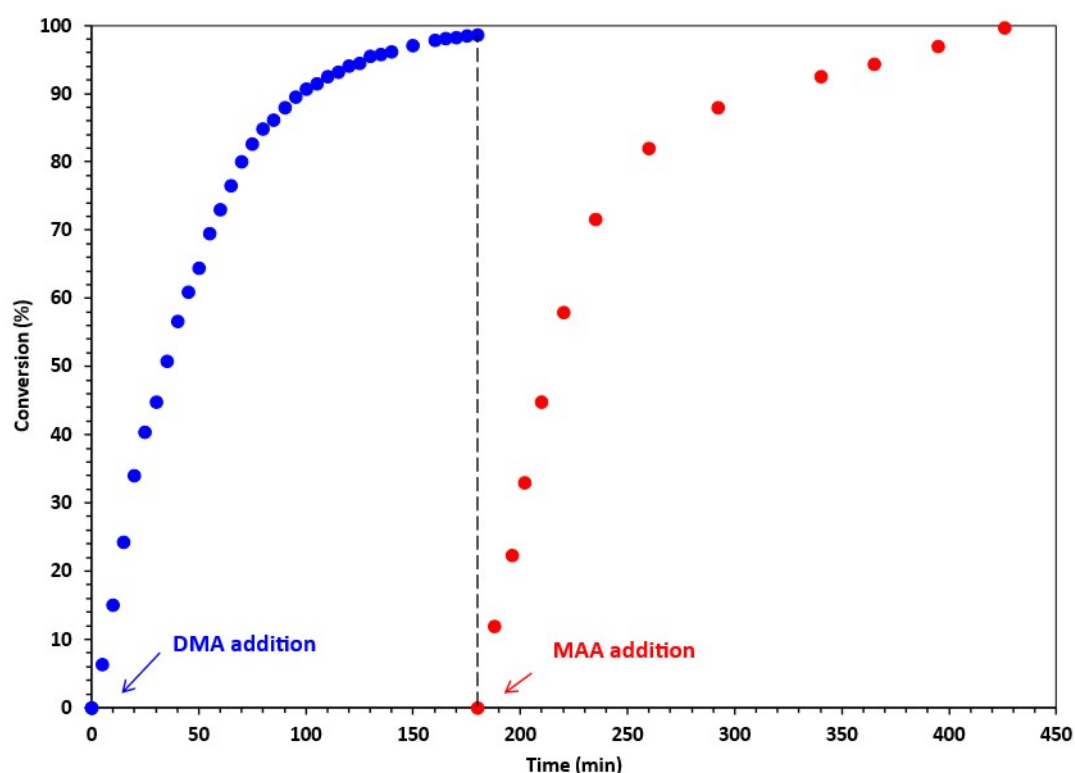

**Figure S1.** Conversion vs. time curves obtained from *in situ*  $^1\text{H}$  NMR spectroscopy studies conducted in  $\text{D}_2\text{O}$  for the wholly aqueous one-pot synthesis of a  $\text{PDMA}_{50}\text{-PMAA}_{50}$  zwitterionic diblock copolymer. Essentially full DMA conversion is achieved within 3 h at 44 °C for the first block, while the subsequent MAA polymerization requires 4.5 h at the same temperature.

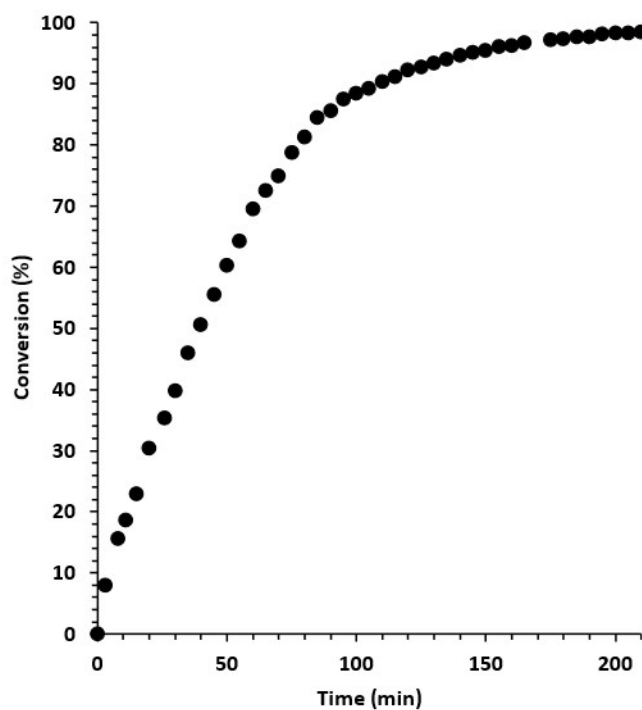

**Figure S2.** Conversion vs. time curve obtained from *in situ*  $^1\text{H}$  NMR spectroscopy studies conducted in  $\text{D}_2\text{O}$  for the wholly aqueous synthesis of a PDMA<sub>100</sub> precursor. Essentially full DMA conversion is achieved within 3.5 h at 44 °C.

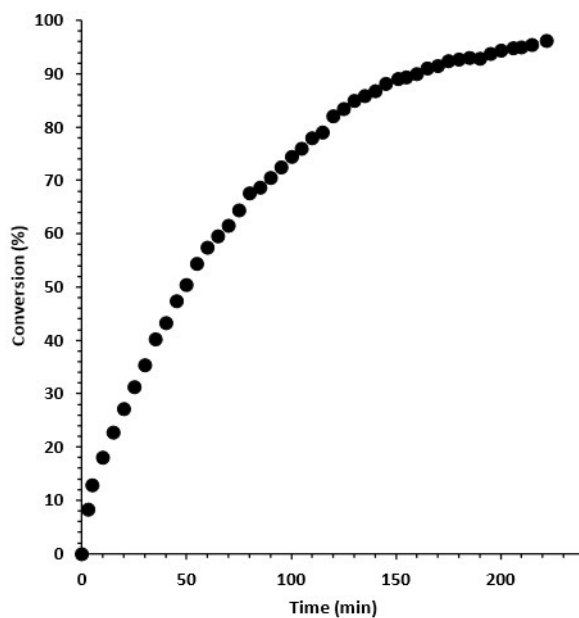

**Figure S3.** Conversion vs. time curve obtained from *in situ*  $^1\text{H}$  NMR spectroscopy studies conducted in  $\text{D}_2\text{O}$  for the wholly aqueous synthesis of a PDMA<sub>200</sub> precursor. Very high (> 95%) DMA conversion is achieved within 4 h at 44 °C.

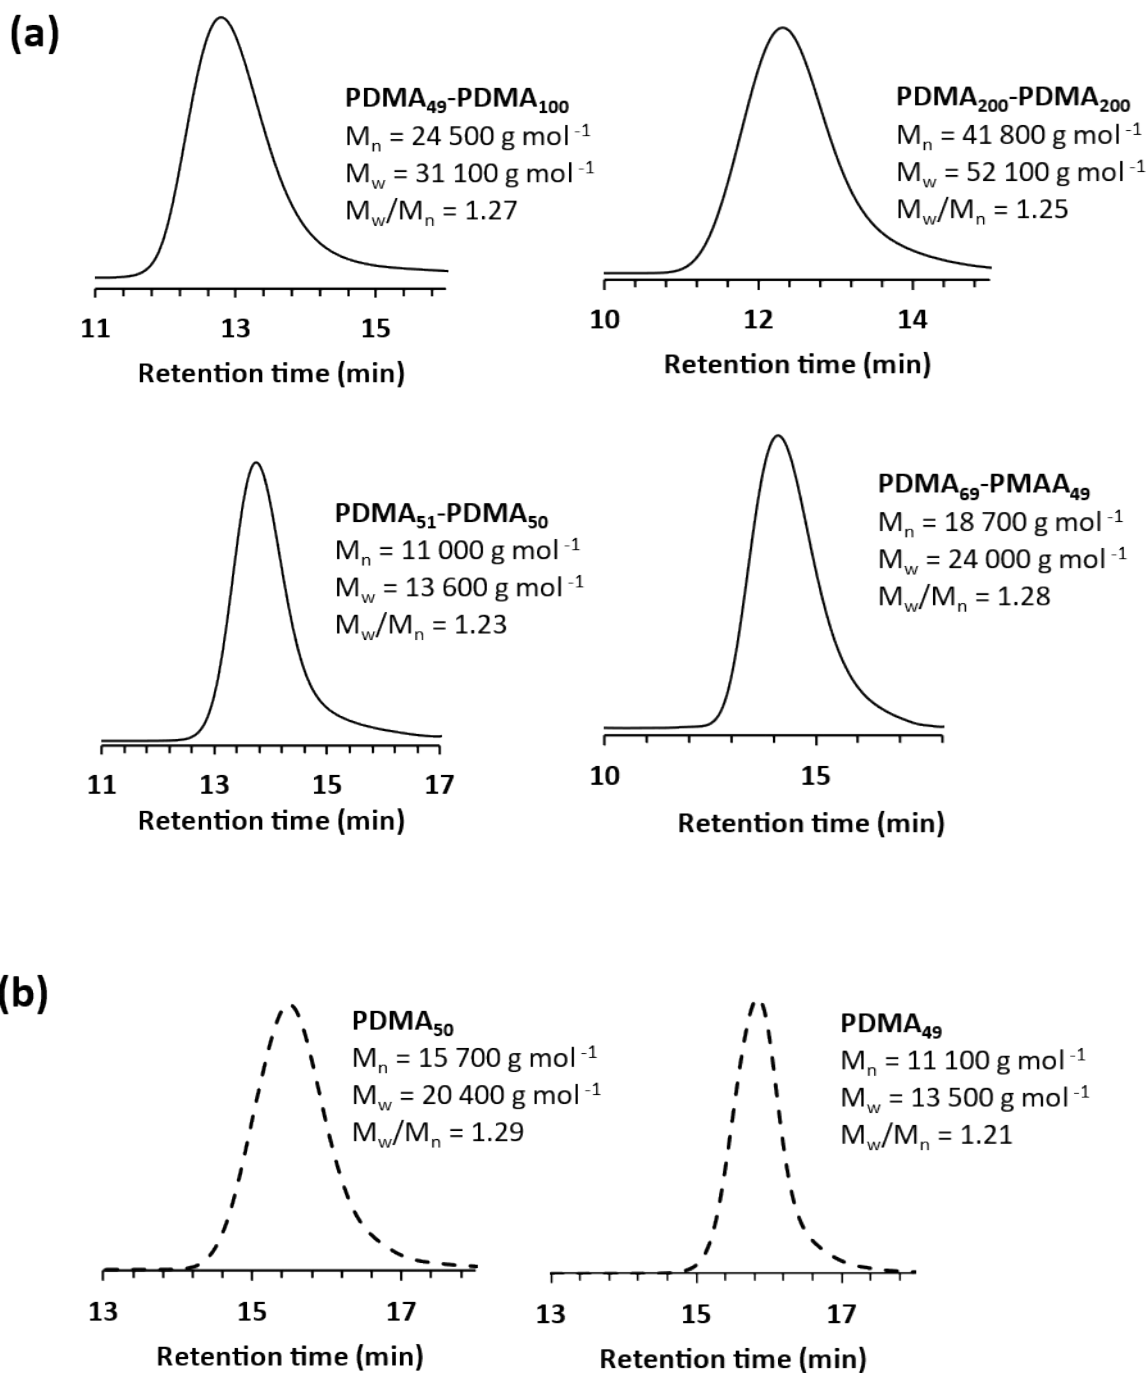

**Figure S4.** Example GPC curves obtained by (a) aqueous GPC of PDMA-PMAA diblock copolymers and (b) THF GPC of PDMA homopolymer (first block).

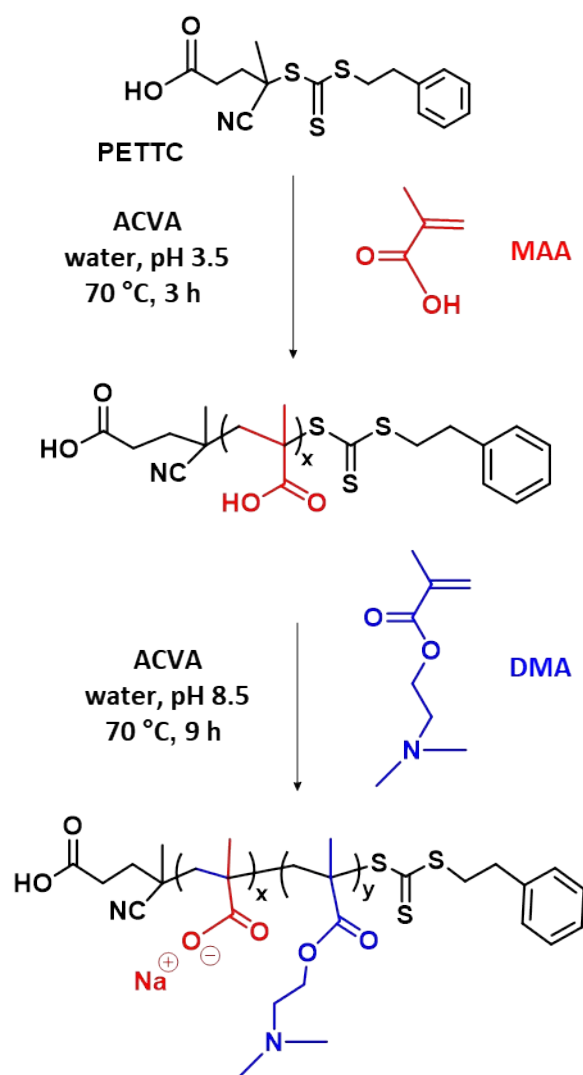

**Scheme S1.** Wholly aqueous one-pot synthetic route to zwitterionic diblock copolymers via RAFT solution polymerisation, where the first block comprises poly(methacrylic acid) (PMAA) and the second block is poly(2-(dimethylamino)ethyl methacrylate) (PDMA).

| Entry | Diblock copolymer composition          | CTA   | PMAA $^1\text{H}$ NMR conversion (%) | PDMA $^1\text{H}$ NMR conversion (%) | Aqueous GPC ( $\text{g mol}^{-1}$ ) |           |
|-------|----------------------------------------|-------|--------------------------------------|--------------------------------------|-------------------------------------|-----------|
|       |                                        |       |                                      |                                      | $M_n$                               | $M_w/M_n$ |
| 1     | PMAA <sub>45</sub> -PDMA <sub>48</sub> | PETTC | 89                                   | 95                                   | 13 800 $\text{g mol}^{-1}$          | 1.35      |
| 2     | PMAA <sub>50</sub> -PDMA <sub>95</sub> | PETTC | 99                                   | 95                                   | 14 700 $\text{g mol}^{-1}$          | 1.47      |
| 3     | PMAA <sub>97</sub> -PDMA <sub>49</sub> | PETTC | 97                                   | 97                                   | 17 700 $\text{g mol}^{-1}$          | 1.23      |

**Table S1.** Summary of the characterization data obtained for six PMAA-PDMA zwitterionic diblock copolymers prepared according to **Scheme S1**. In each case, the second stage polymerization of DMA was conducted in aqueous solution at pH 8.5.  $^1\text{H}$  NMR spectroscopy was used to calculate the final comonomer conversion achieved for each block.

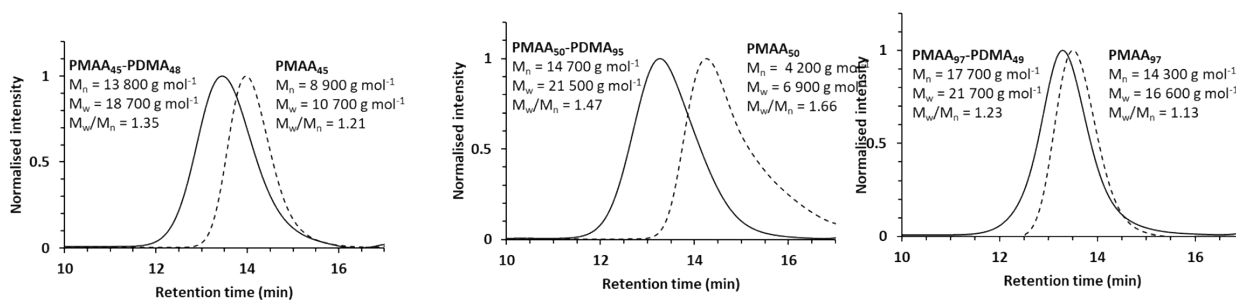

**Figure S5.** Example aqueous GPC traces of PMAA precursors and PMAA-PDMA diblock copolymers listed in Table S1 to show blocking efficiency and to determine molecular weight distribution.

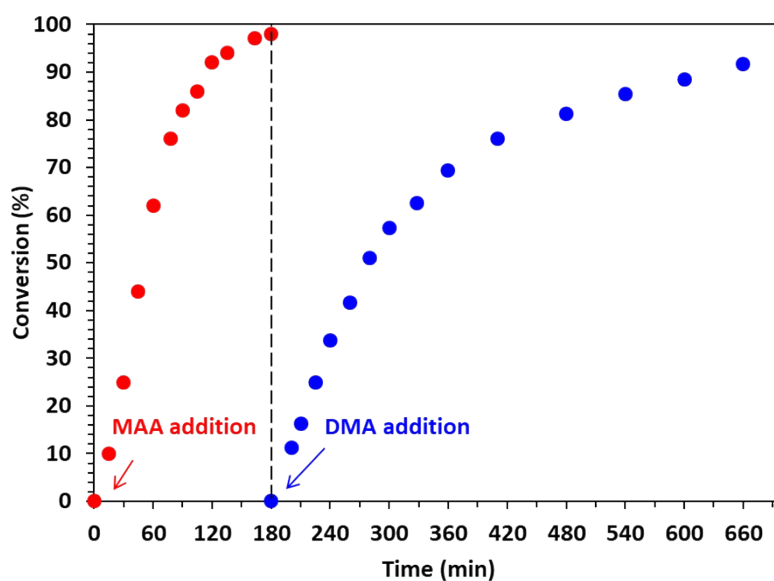

**Figure S6.** Conversion vs. time curves obtained by periodic reaction sampling, determined by  $^1\text{H}$  NMR spectroscopy studies conducted in  $\text{D}_2\text{O}$  for the wholly aqueous one-pot synthesis of a PMAA<sub>50</sub>-PDMA<sub>100</sub> zwitterionic diblock copolymer (target composition). Full MAA conversion is achieved within 3 h at 44 °C for the first block in this case, while the subsequent MAA polymerization requires 4.5 h at the same temperature.

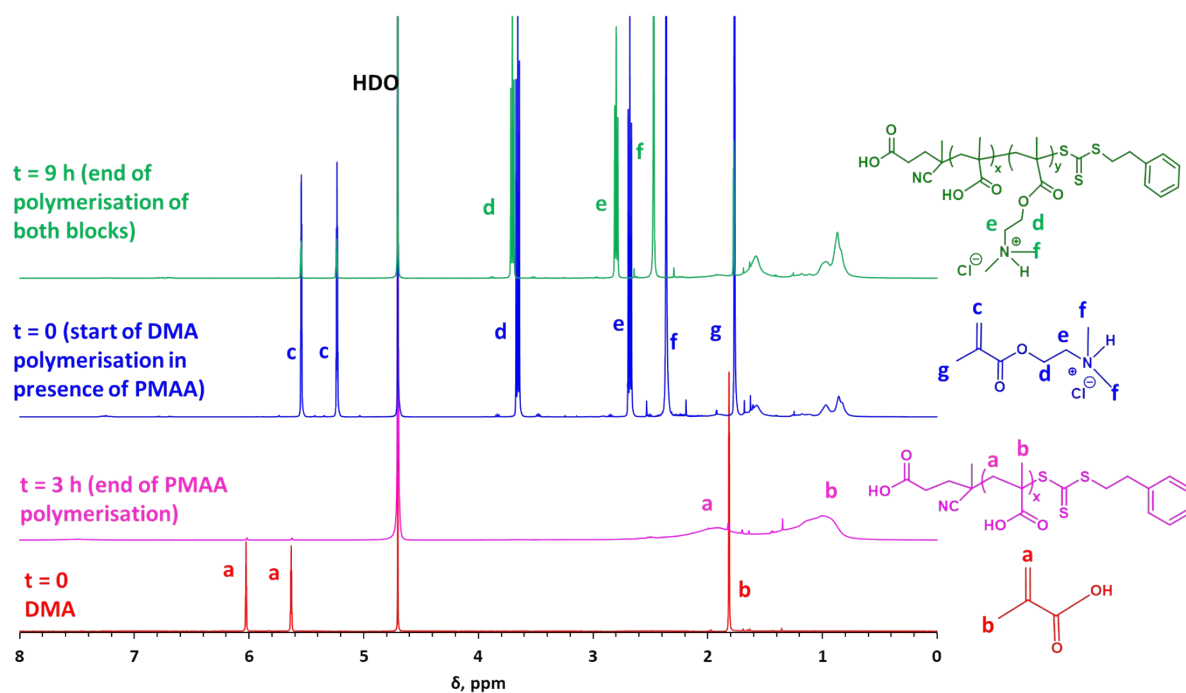

**Figure S7.** Selected  $^1\text{H}$  NMR spectra recorded in  $\text{D}_2\text{O}$  at the start (red) and end (pink) of the RAFT aqueous solution polymerization of MAA and the start (blue) and end (green) of the subsequent DMA polymerization (see **Scheme S1**).

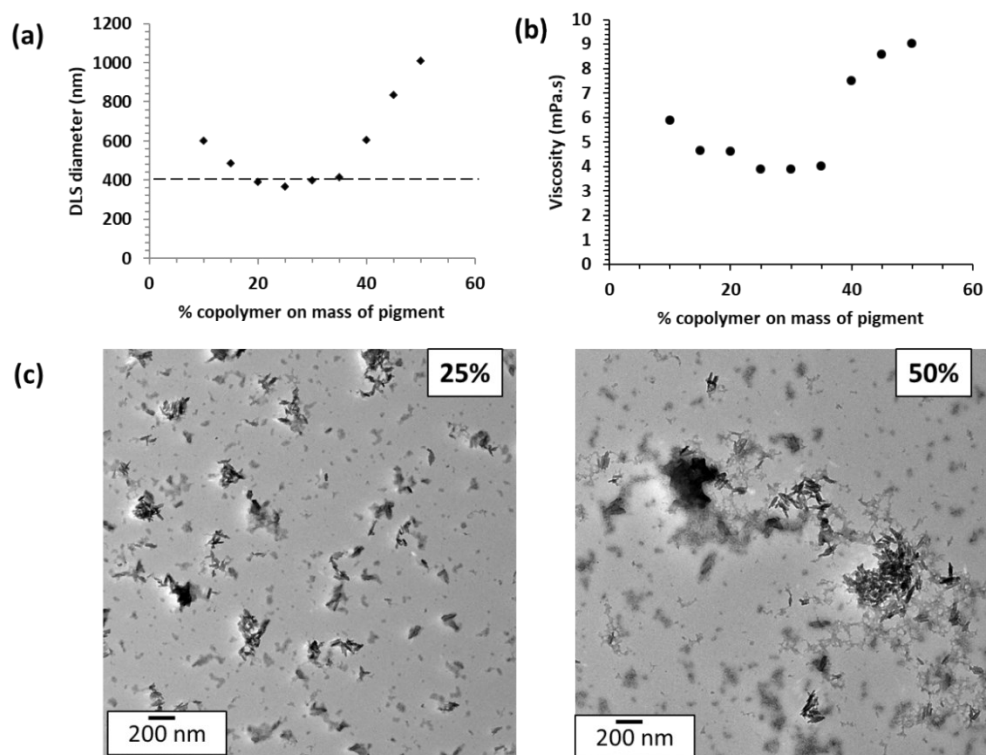

**Figure S8.** Dispersion of transparent yellow iron oxide with  $\text{PDMA}_{49}\text{-PMAA}_{100}$  at pH 7.5, above the copolymer IEP (a) DLS diameter at varying copolymer concentration, (b) viscosity at varying copolymer concentration and (c) TEM images at 25% and 50% copolymer with respect to pigment.

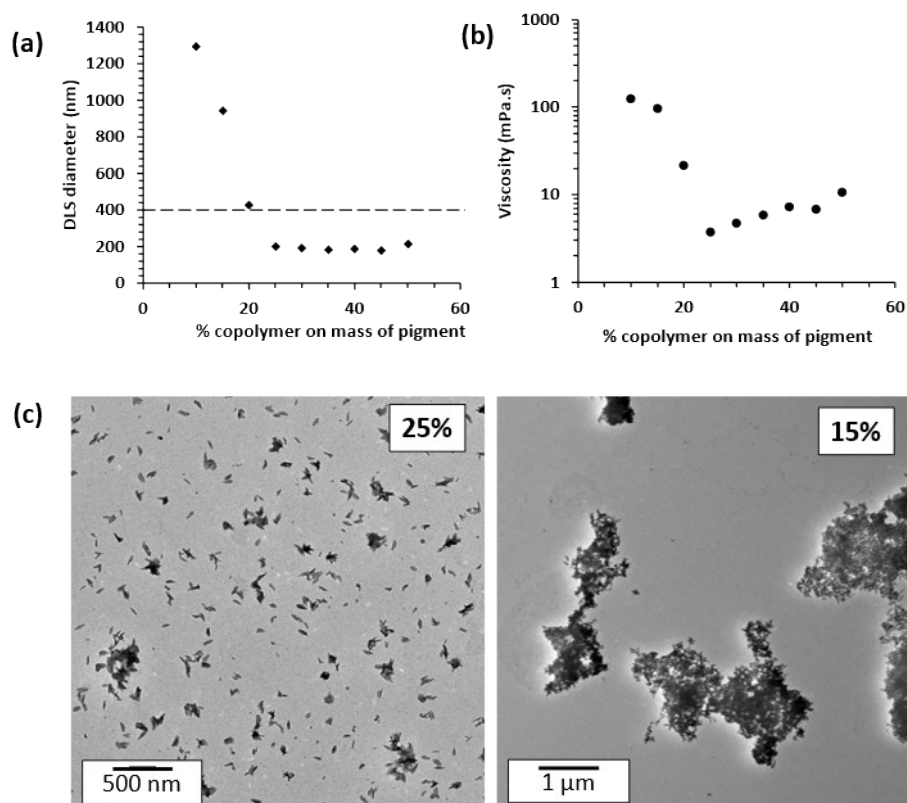

**Figure S9.** Dispersion of transparent yellow iron oxide with PDMA<sub>49</sub>-PMAA<sub>100</sub> at pH 3.5, below the copolymer IEP (a) DLS diameter at varying copolymer concentration, (b) viscosity at varying copolymer concentration and (c) TEM images at 25% and 15% copolymer with respect to pigment.

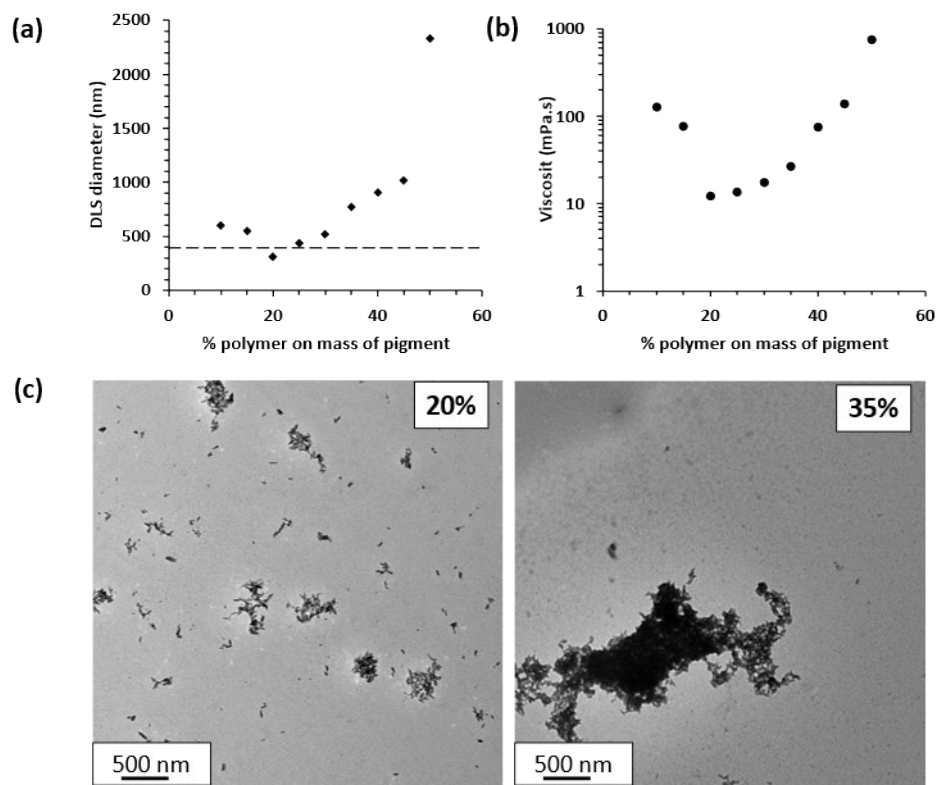

**Figure S10.** Dispersion of transparent yellow iron oxide with PDMA<sub>100</sub>-PMAA<sub>50</sub> at pH 10.5, above the copolymer IEP (a) DLS diameter at varying copolymer concentration, (b) viscosity at varying copolymer concentration and (c) TEM images at 20% and 35% copolymer with respect to pigment.

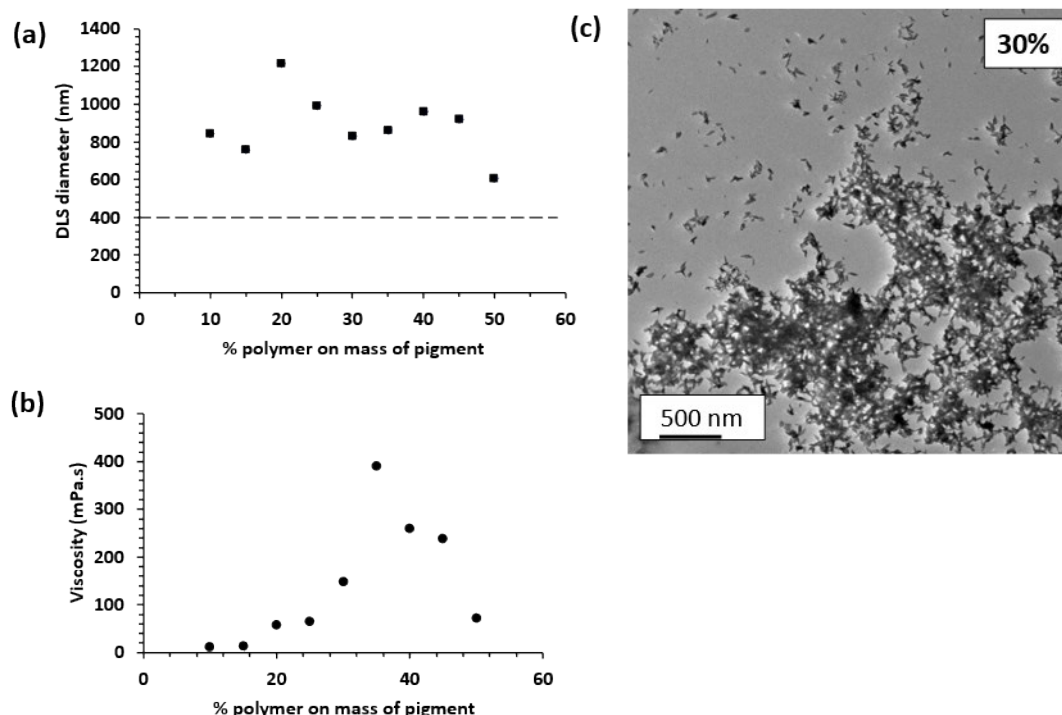

**Figure S11.** Dispersion of transparent yellow iron oxide with PDMA<sub>100</sub>-PMAA<sub>50</sub> at pH 5.0, below the copolymer IEP (a) DLS diameter at varying copolymer concentration, (b) viscosity at varying copolymer concentration and (c) TEM image at 30% copolymer with respect to pigment.

**Table S2.** Summary of the optimal concentration, minimum apparent pigment diameter and dispersion viscosity of aqueous dispersions of transparent yellow iron oxide particles prepared using three different PDMA<sub>x</sub>-PMAA<sub>y</sub> diblock copolymers at a solution pH either above or below their IEP.

| Copolymer                               | pH   | Optimal concentration | Minimum pigment size at optimal [copolymer] (nm) | Minimum dispersion viscosity at optimal [copolymer] (mPa.s) |
|-----------------------------------------|------|-----------------------|--------------------------------------------------|-------------------------------------------------------------|
| PDMA <sub>51</sub> -PMAA <sub>50</sub>  | 8.5  | 25%                   | 118                                              | 3.21                                                        |
|                                         | 4.0  | 20%                   | 165                                              | 3.30                                                        |
| PDMA <sub>49</sub> -PMAA <sub>100</sub> | 7.5  | 25%                   | 369                                              | 3.88                                                        |
|                                         | 3.5  | 25%                   | 201                                              | 3.75                                                        |
| PDMA <sub>100</sub> -PMAA <sub>50</sub> | 10.5 | 20%                   | 305                                              | 12.03                                                       |
|                                         | 5.0  | -                     | 606                                              | 13.2                                                        |
